# Supplementary material
Source: bioRxiv or medRxiv preprint supplement (http://medrxiv.stage.highwire.org/highwire/filestream/77098/field_highwire_adjunct_files/1/2020.04.06.20055665-2.zip)
Supplement: Supplementary file [file 2020.04.06.20055665-2.zip]

# Method for Printing Leeds-Venturi Valve

## Introduction

The Leeds-Venturi valve was printed in a Form 3 printer (Formlabs Inc, Somerville, USA) using Surgical Guide Version 1 resin. Note that this is not the same as Dental SG resin, and performs and processes differently.

## Print Set Up

The Leeds-Venturi STL file is included in the Additional Data section, along with a build file containing 10 valves on a platform, as orientated during our experiments. The valves were orientated at approximately 45 degrees, ensuring no unsupported overhangs. Slice thickness was set at 100 microns, and the support settings are shown in Figure 1. Internal supports within the chamber were manually removed.

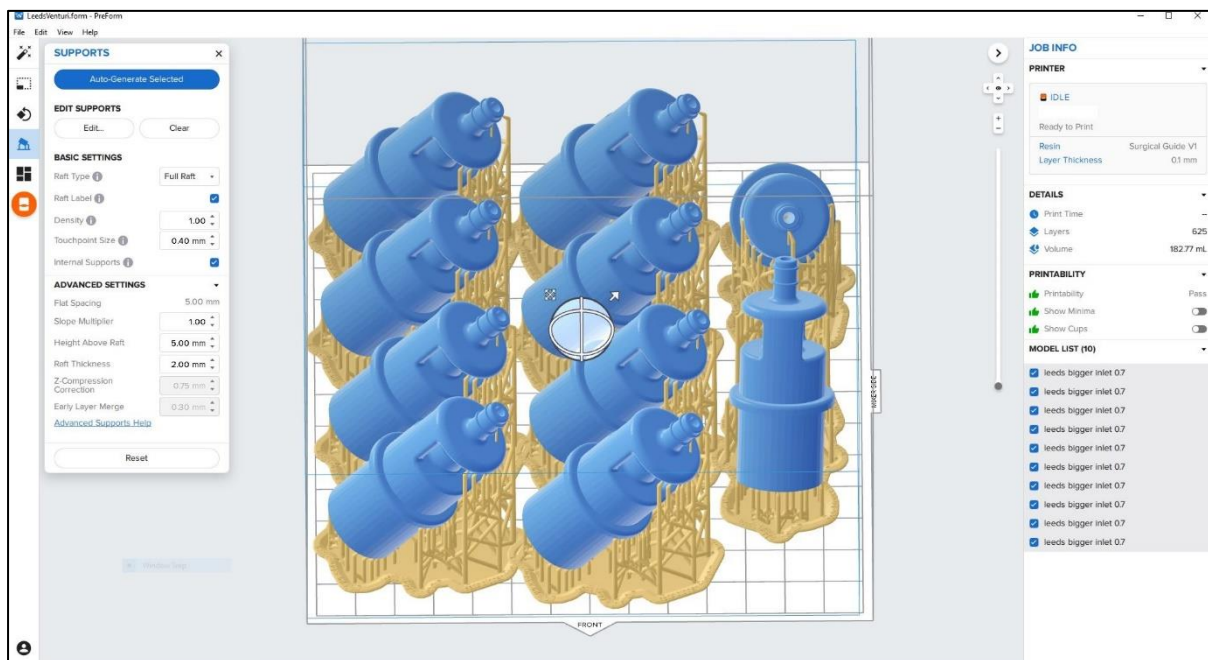

Figure 1 The PreForm settings for the build

## Post Processing

Following the print, the valves were transferred to a Form Wash containing 2-Propanol (density 0.79 kg/l) and washed for 20 minutes.

Next the valves were removed from the build plate and the oxygen inlet orifices were rinsed with 2-Propanol using a Monoject syringe (3mL with 27GA needle to ensure easy passage through). The sprues were removed and the valves were thoroughly dried with compressed air.

Post curing took place in a Form Cure, set at 70 degrees for 30 minutes.

Finally, the oxygen inlet orifices were gauged and refined using a size 60 dental endodontic K-file 0.02 taper (Dentsply-Maillefer, Ballaigues, Switzerland), set to length 22mm (Figure 2). Note that this length ensured an orifice diameter of 0.75mm.

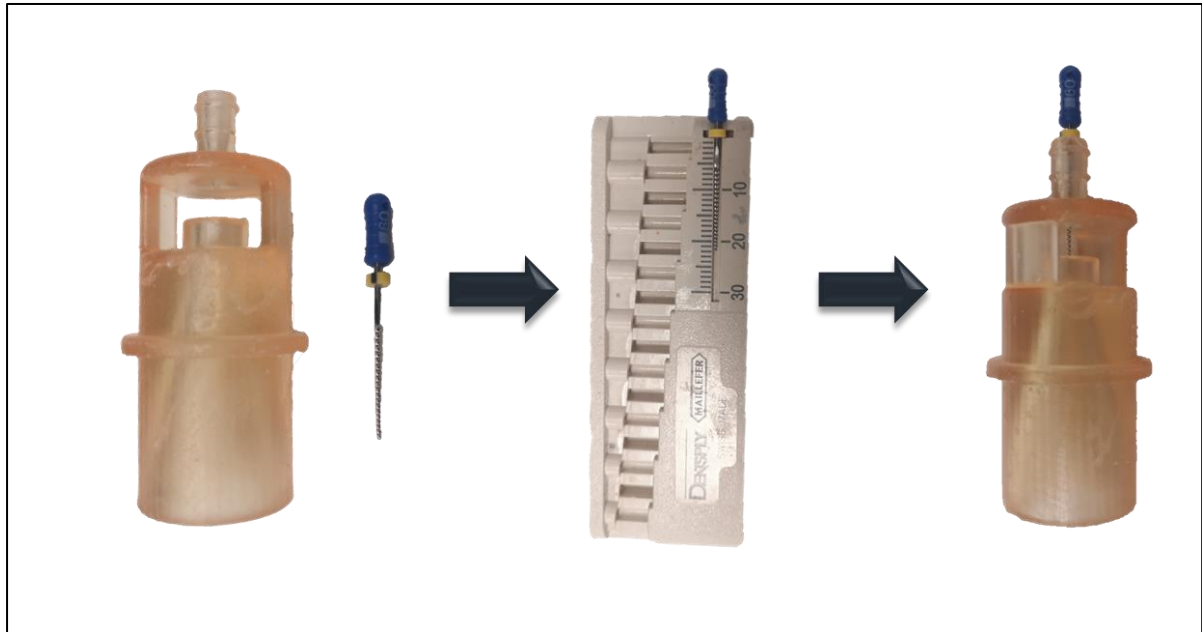

*Figure 2 Refining the oxygen inlet. A standard dental endodontic K-file (size 60, 0.02 taper) was set to 22mm and used to ensure a uniform orifice diameter*

Any remaining sprue nodules were lightly sanded down. Optionally, these valves could now be autoclaved before use, although this was not performed prior to testing in these experiments.
