# Supplementary material
Source: bioRxiv or medRxiv preprint supplement (http://medrxiv.stage.highwire.org/highwire/filestream/77098/field_highwire_adjunct_files/1/2020.04.06.20055665-2.zip)

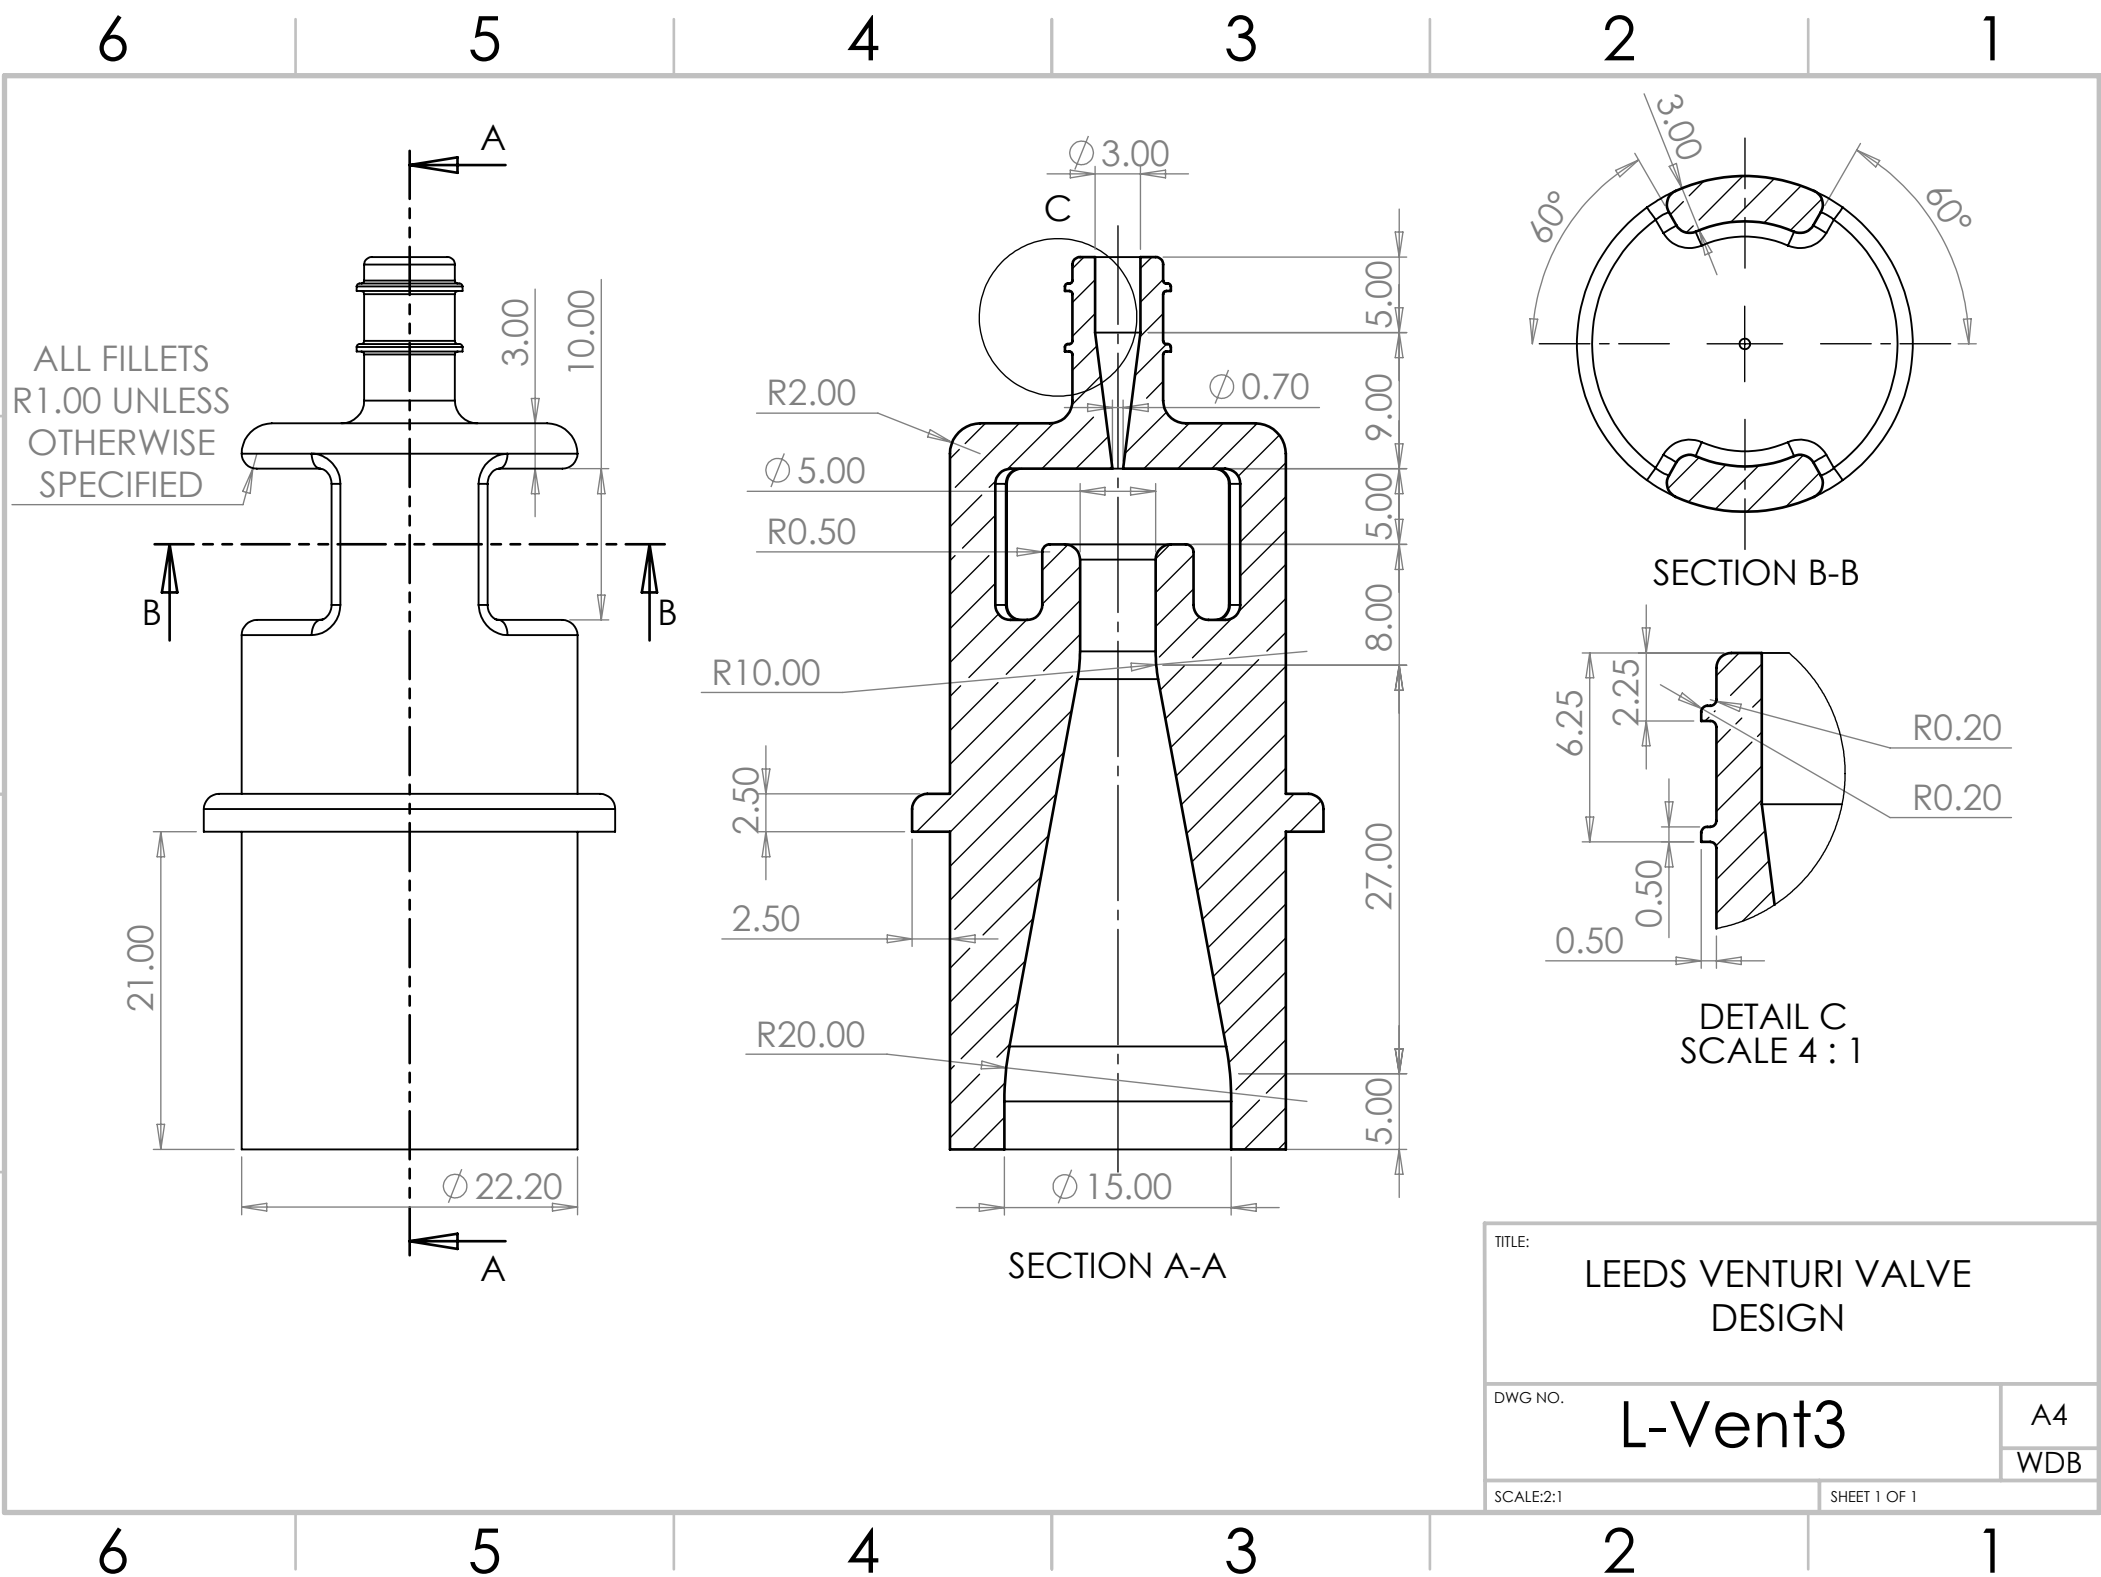

Supplement: Supplementary file [file 2020.04.06.20055665-2.zip]
